# Supplementary material for: Molecular Structures and Spectral Properties of Natural Indigo and Indirubin: Experimental and DFT Studies
Source: PubMed Central journal article supplement (PMC6865026; doi:10.3390/molecules24213831), 2019-10-24
Supplement: molecules-24-03831-s001.pdf [file molecules-24-03831-s001.pdf]

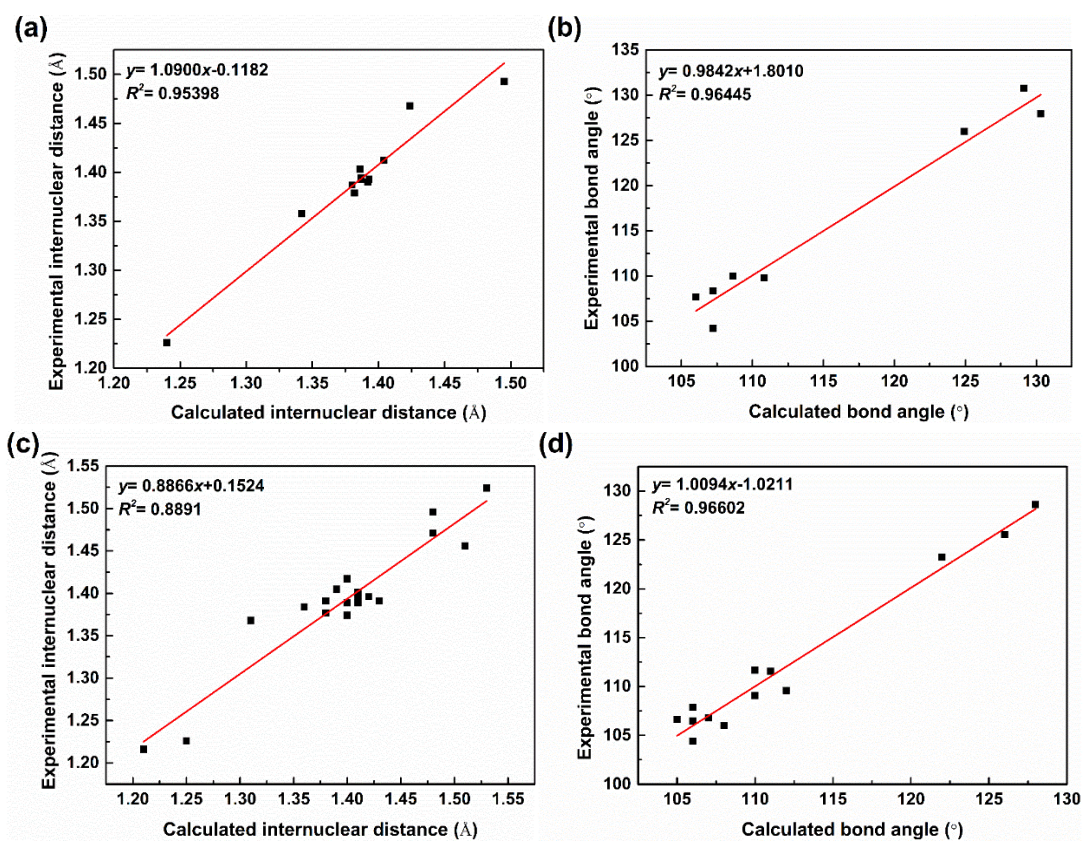

**Figure S1.** The correlation between computational and experimental data in literature of bond lengths and angles of indigo (a,b) and indirubin (c,d).
